# Supplementary material
Source: Springer Nature journal article supplement (https://www.springermedizin.de/resource/supplementary/12885_2010_2759_MOESM1_ESM.pdf/9461874)

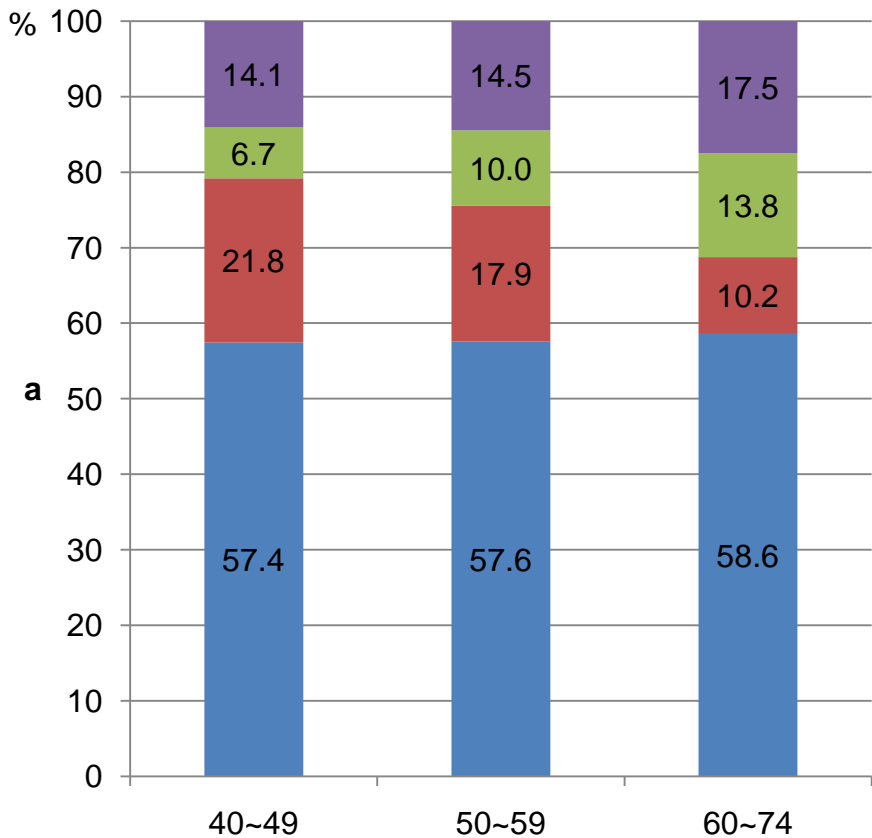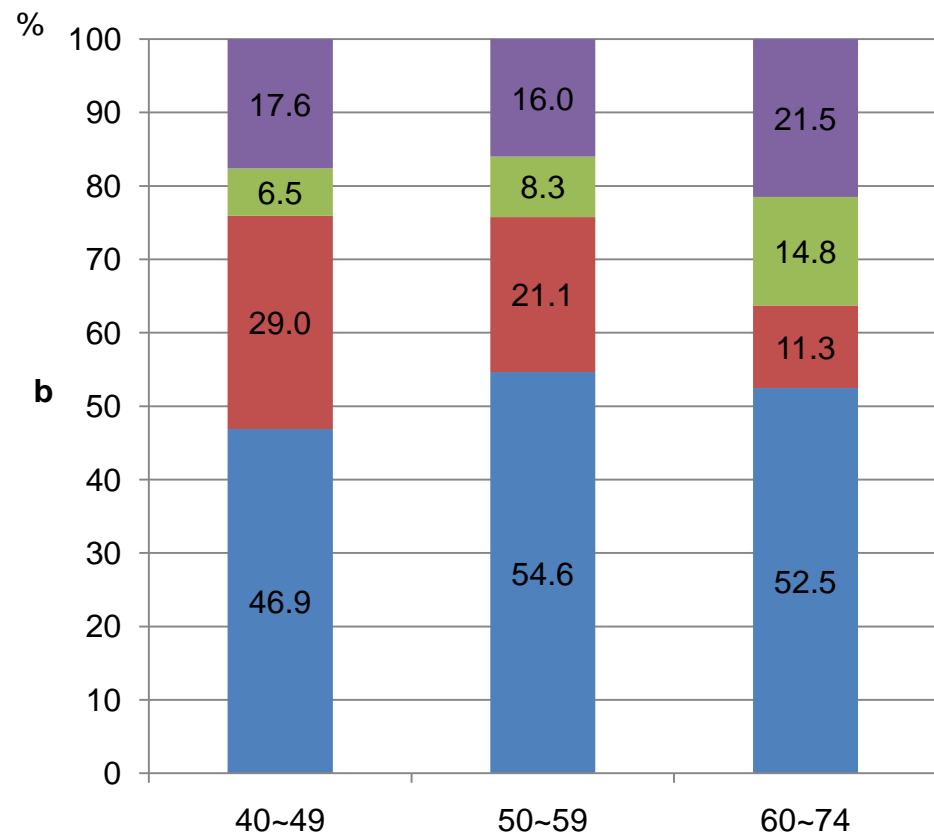

■ feel that it is not necessary 
 ■ lack of time 
 ■ cannot afford it 
 ■ other

Supplement: MOESM1 [file 9461874]
